# Supplementary material for: Polarization-Diversity Optical Coherence Tomography Assessment of Choroidal Nevi
Source: PubMed Central journal article supplement — Invest Ophthalmol Vis Sci. 2023 Nov 6;64(14):6. doi: 10.1167/iovs.64.14.6 (PMC10629548; doi:10.1167/iovs.64.14.6), 2023-11-06
Supplement: iovs-64-14-6_s001.pdf [file iovs-64-14-6_s001.pdf]

# **Polarization-Diversity Optical Coherence Tomography Assessment of Choroidal Nevi**

Yusi Miao<sup>1,†</sup>, Hoyoung Jung<sup>2,†</sup>, Destiny Hsu<sup>3</sup>, Jun Song<sup>4</sup>, Shuibin Ni<sup>5</sup>, Da Ma<sup>6</sup>, Yifan Jian<sup>5</sup>,  
Shuichi Makita<sup>7</sup>, Yoshiaki Yasuno<sup>7</sup>, Marinko V. Sarunic<sup>3,8,9</sup>, Kirk A. J. Stephenson<sup>1</sup>, Katherine  
Paton<sup>1</sup>, Zaid Mammo<sup>1,\*</sup>, and Myeong Jin Ju<sup>1,4,\*</sup>

<sup>1</sup>Department of Ophthalmology and Visual Sciences, University of British Columbia, Vancouver BC, Canada V5Z 3N9.

<sup>2</sup>Faculty of Medicine, University of British Columbia, Vancouver BC, Canada V6T 1Z3.

<sup>3</sup>School of Engineering Science, Simon Fraser University, Burnaby, BC Canada V5A 1S6.

<sup>4</sup>School of Biomedical Engineering, University of British Columbia, Vancouver, BC Canada V6T 1Z4.

<sup>5</sup>Case Eye Institute, Oregon Health & Science University, Portland, OR 97239, USA.

<sup>6</sup>Gerontology and Geriatric Medicine, Wake Forest University School of Medicine, Winston-Salem, NC 27101, USA.

<sup>7</sup>Faculty of Medicine, University of Tsukuba, Tsukuba, Ibaraki 305-8573, Japan.

<sup>8</sup>Department of Medical Physics and Biomedical Engineering, University College London, UK.

<sup>9</sup>Institute of Ophthalmology, University College London, UK.

\*Corresponding Authors: Dr. Myeong Jin Ju, Dr. Zaid Mammo

†These authors contributed equally

Address: 2550 Willow Street, Vancouver, BC, V5Z 3N9, Canada

E-mail: [myeongjin.ju@ubc.ca](mailto:myeongjin.ju@ubc.ca), [zaid.mammo@ubc.ca](mailto:zaid.mammo@ubc.ca)

Phone: 604 875 4555

## Supplementary Materials

Supplementary Table 1. **Imaging speed and field-of-view (FOV) of polarization-sensitive optical coherence tomography (PS-OCT) in the literature.**

| <i>Ju et al.</i> <sup>52</sup> | <i>Makita et al.</i> <sup>32</sup> | <i>Sakai et al.</i> <sup>16</sup> | <i>Schwarzahans et al.</i> <sup>53,54</sup> | Current study                  |
|--------------------------------|------------------------------------|-----------------------------------|---------------------------------------------|--------------------------------|
| 100 kHz                        | 100 kHz                            | 100 kHz                           | 70 kHz                                      | 400 kHz                        |
| 4.5 × 4.5 mm<br>(15°)          | 6 × 6 mm<br>(20°)                  | 6 × 6 mm<br>(20°)                 | 8 × 6 mm<br>(28° × 21°)                     | 16.5 × 16.5 mm<br>(55°)        |
| 300 A-scans<br>× 300 B-scans   | 512 A-scans ×<br>1024 B-scans      | 1024 A-scans ×<br>256 B-scans     | 1024 A-Scans<br>× 250 B-Scans               | 1000 A-scans ×<br>1000 B-scans |
| 0.9                            | 6.5                                | > 2.62                            | > 3.65                                      | 2.5                            |

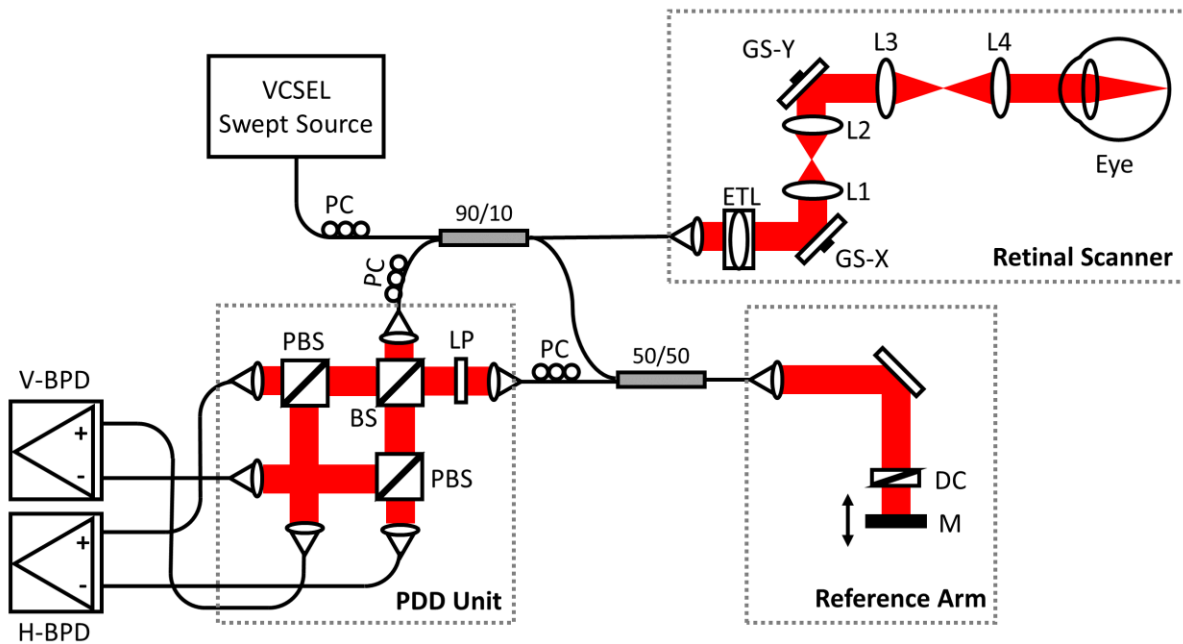

**Supplementary Figure 1.** Schematic of the wide-field polarization-diversity optical coherence tomography (PD-OCT) system. M: mirror; PC: polarization controller; DC: dispersion compensation block; LP: linear polarizer; BS: beam splitter; PBS: polarization beam splitter; L1-L4: lens; ETL: electrical tunable lens; GS-X and -Y: x-axis and y-axis galvanometer scanner; V- and H-BPD: balanced photodetector for horizontally and vertically polarized signals.

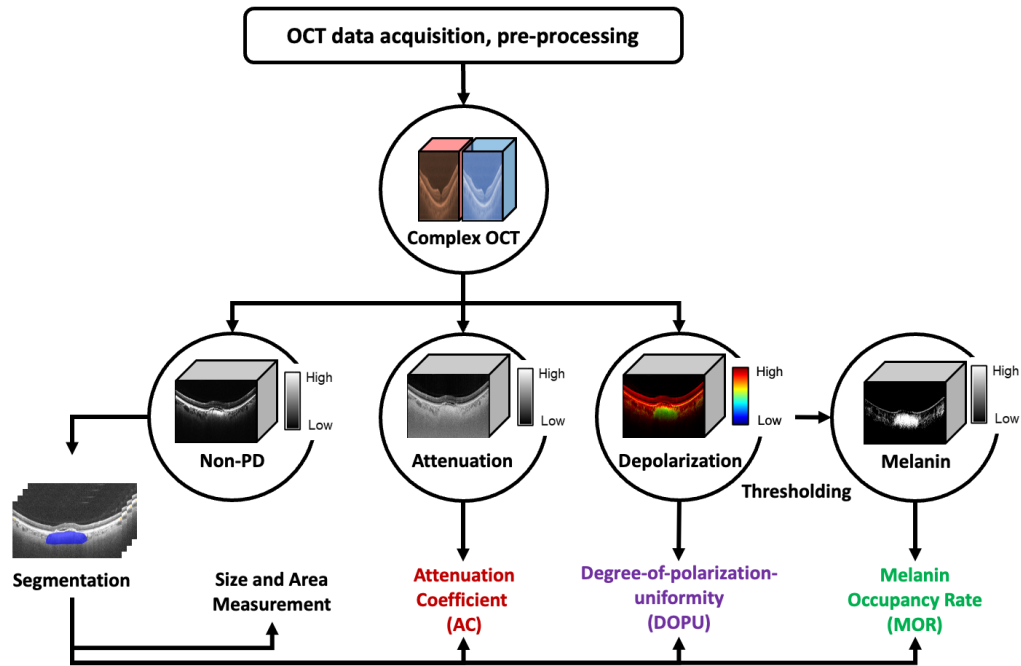

**Supplementary Figure 2.** Post-processing pipeline of polarization-diversity optical coherence tomography (PD-OCT) acquisition data.

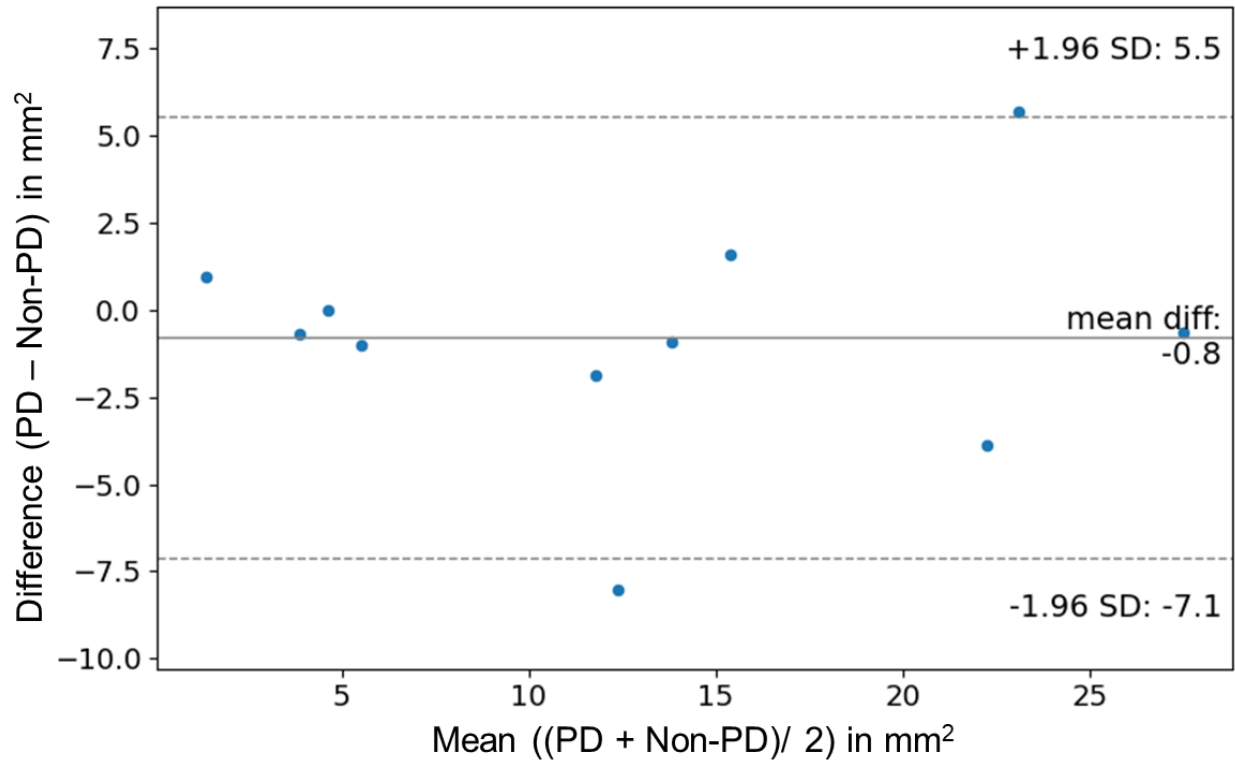

**Supplementary Figure 3:** Bland-Altman plot showing the relationship between the differences in lesion area measurement obtained with segmentation of polarization-diversity optical coherence tomography (PD-OCT) *en face* projection versus whole-volume segmentation of non-PD-OCT B-scans, and the mean of the two area measurements for each nevus (n = 11).

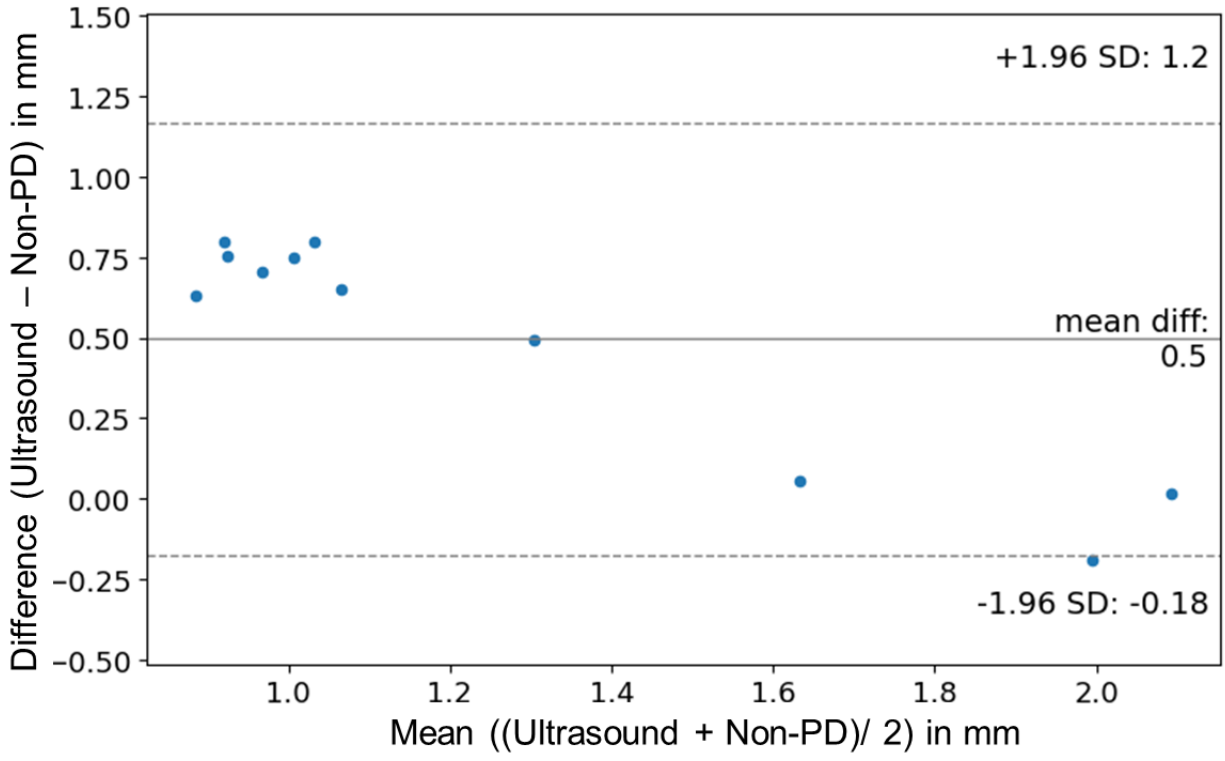

**Supplementary Figure 4:** Bland-Altman plot showing the relationship between the differences in lesion height measurement obtained with ultrasound versus segmentation of non-polarization-diversity optical coherence tomography (non-PD-OCT) B-scan, and the mean of the two height measurements for each nevus (n = 11).
